# Supplementary material
Source: HighWire-hosted journal article supplement (http://www.cmaj.ca/highwire/filestream/59615/field_highwire_adjunct_files/0/160027-profile-1-at.pdf)
Supplement: 160027-profile-1-at.pdf [file 160027-profile-1-at.pdf]

**Appendix 1 (as supplied by the author):** Some cells from *The Bad Doctor*

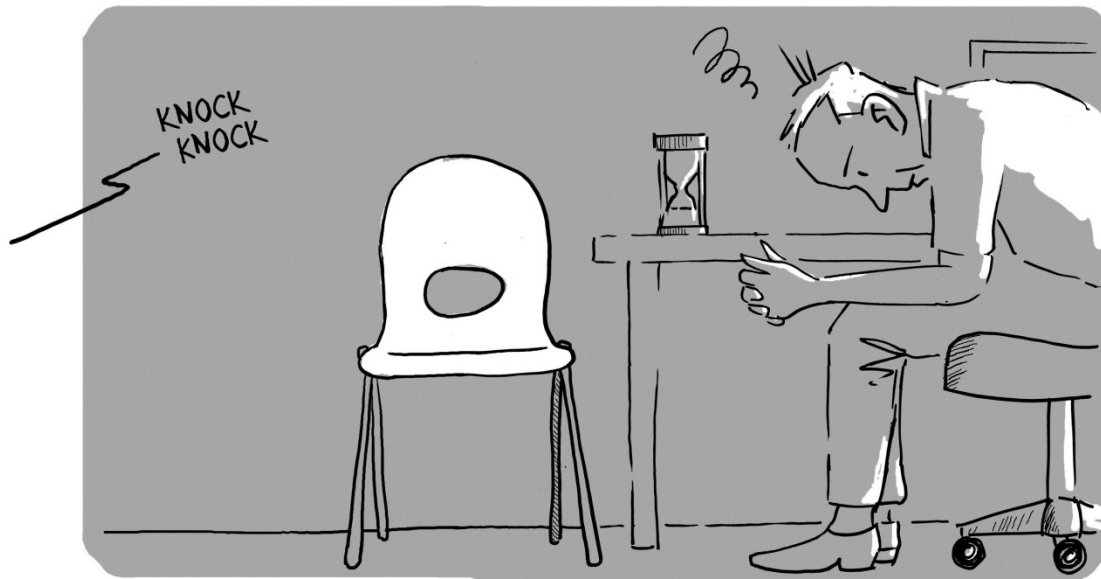

*The Bad Doctor*, Ian Williams/Penn State University Press [www.psupress.org](http://www.psupress.org)

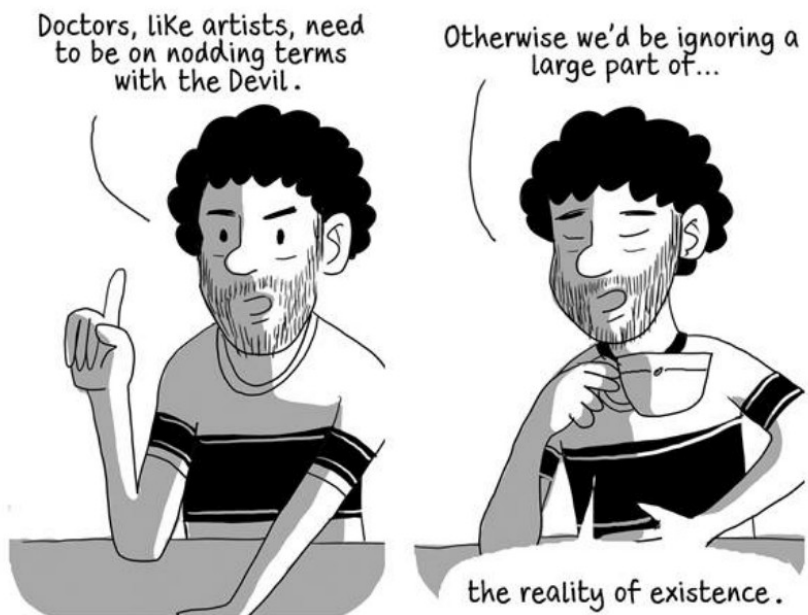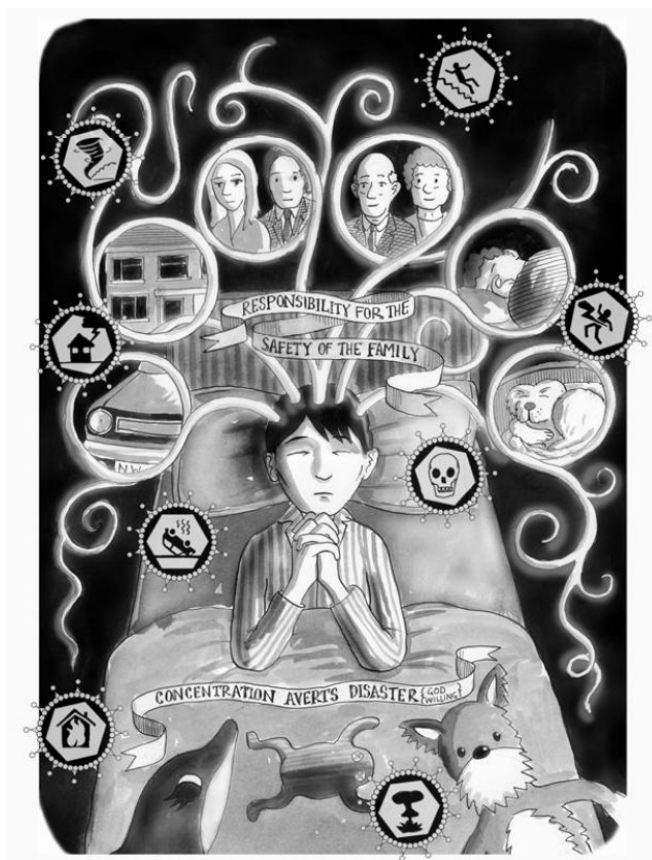

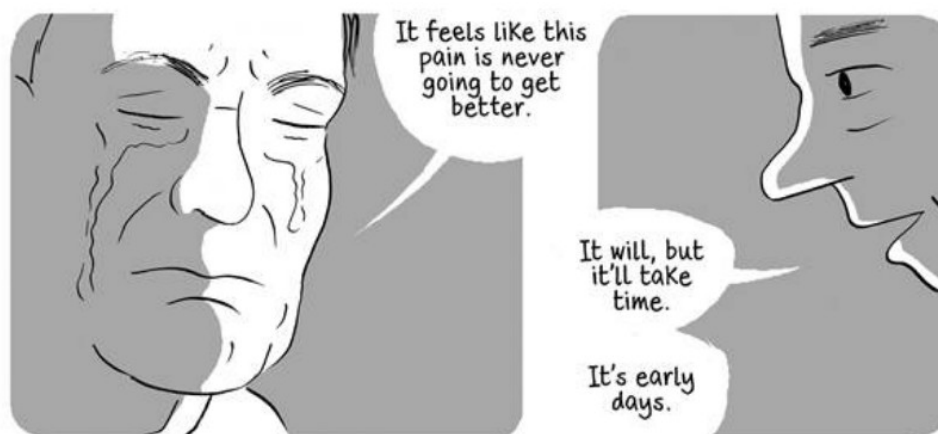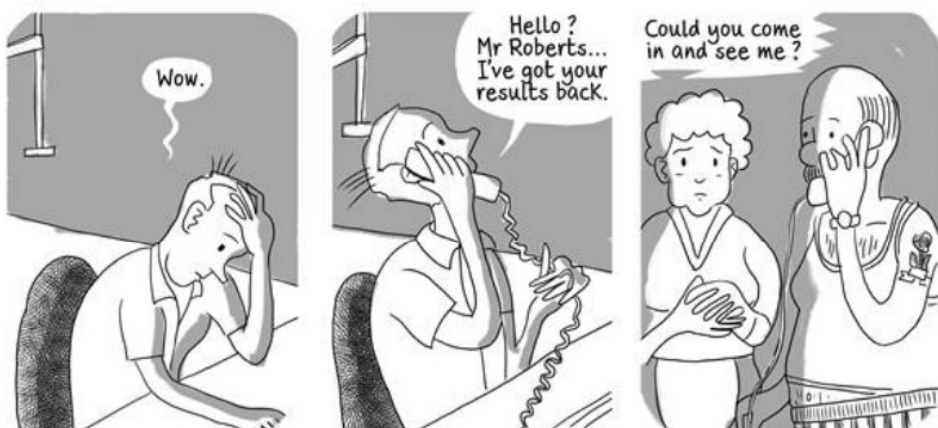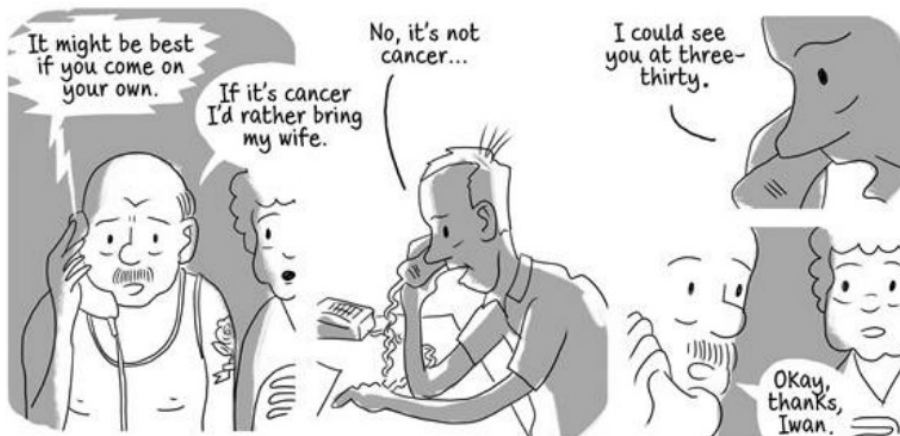

The physician has discovered this older patient has syphilis and doesn't want his wife present when the bad news is delivered. The man later tells the doctor he must have caught syphilis going to a gay bathhouse in Wales. This is an example of the kind of dilemmas the cartoon doctor faces. He often fears he is The Bad Doctor, that he did not handle such patients properly. Williams hopes that in reading the cartoons, doctors will reflect on their own actions.

*The Bad Doctor*, Ian Williams/Penn State University Press [www.psupress.org](http://www.psupress.org)
